# Supplementary material for: Me-graphene: a graphene allotrope with near zero Poisson's ratio, sizeable band gap, and high carrier mobility
Source: Royal Society of Chemistry journal article supplement (doi:10.1039/d0nr03869e), 2020-01-01
Supplement: d0nr03869e1.pdf [file d0nr03869e1.pdf]

## Supporting Information

### **Me-Graphene: A Graphene Allotrope with Near Zero Poisson's Ratio, Sizeable Band Gap, and High Carrier Mobility**

Zhiwen Zhuo,<sup>a</sup> Xiaojun Wu,<sup>a,b,\*</sup> and Jinlong Yang<sup>a,b</sup>

<sup>a</sup> Hefei National Laboratory for Physical Sciences at the Microscale, School of Chemistry and Materials Sciences, CAS Key Laboratory of Materials for Energy Conversion, and CAS Center for Excellence in Nanoscience, University of Science and Technology of China, Hefei, Anhui 230026, China

<sup>b</sup> Synergetic Innovation of Quantum Information & Quantum Technology, University of Science and Technology of China, Hefei, Anhui 230026, China

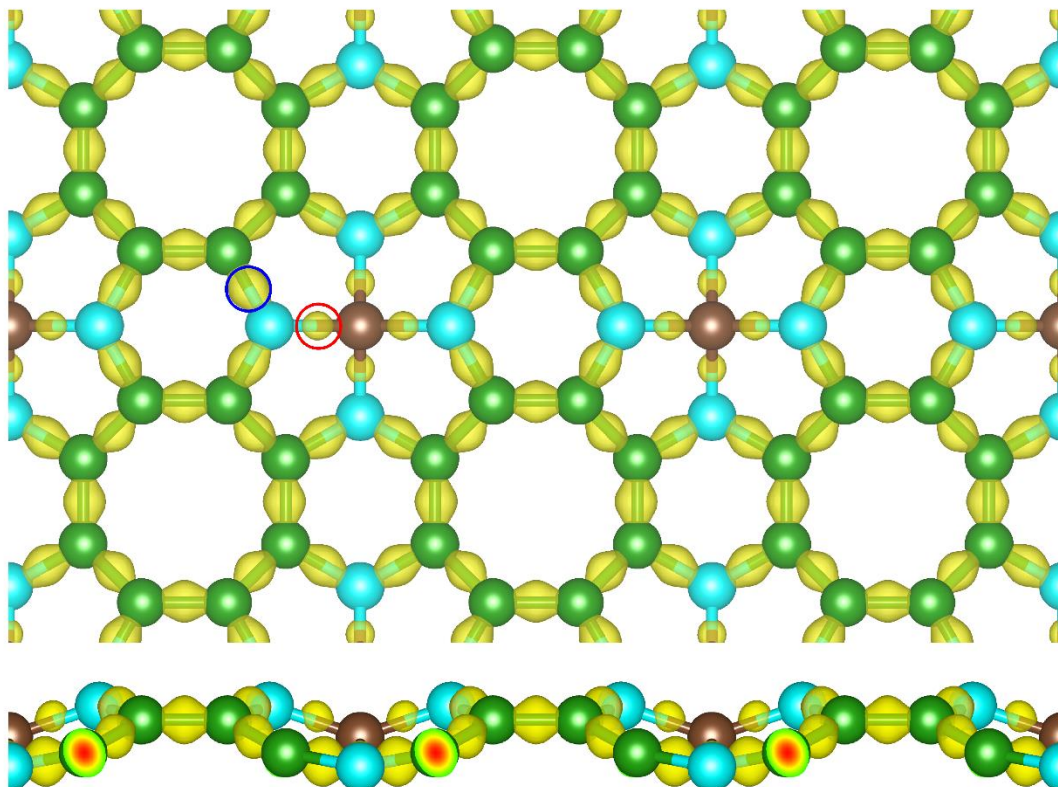

**Fig. S1** Deformation charge density of Me-graphene (isosurface is 0.03 e/Bohr<sup>3</sup>)

The deformation charge can unveil the bonding degree with its value, larger and thicker density distribution in yellow color (electron density increase zone) indicates high bonding degree that introduced by delocalized  $\pi$  bond with existence of the highly localized  $\sigma$  bonding. The similar density over all  $sp^2$  carbon (blue circle) indicates the widely delocalized  $\pi$  bond, while the bonding of  $sp^3$  carbon (red circle) is the highly localized  $\sigma$  bonding, which has smaller density cloud volume with same isosurface. Note that the electron density decrease zone (in blue color indeed) is too small to see with setting of isosurface of 0.03 e/Bohr<sup>3</sup>.

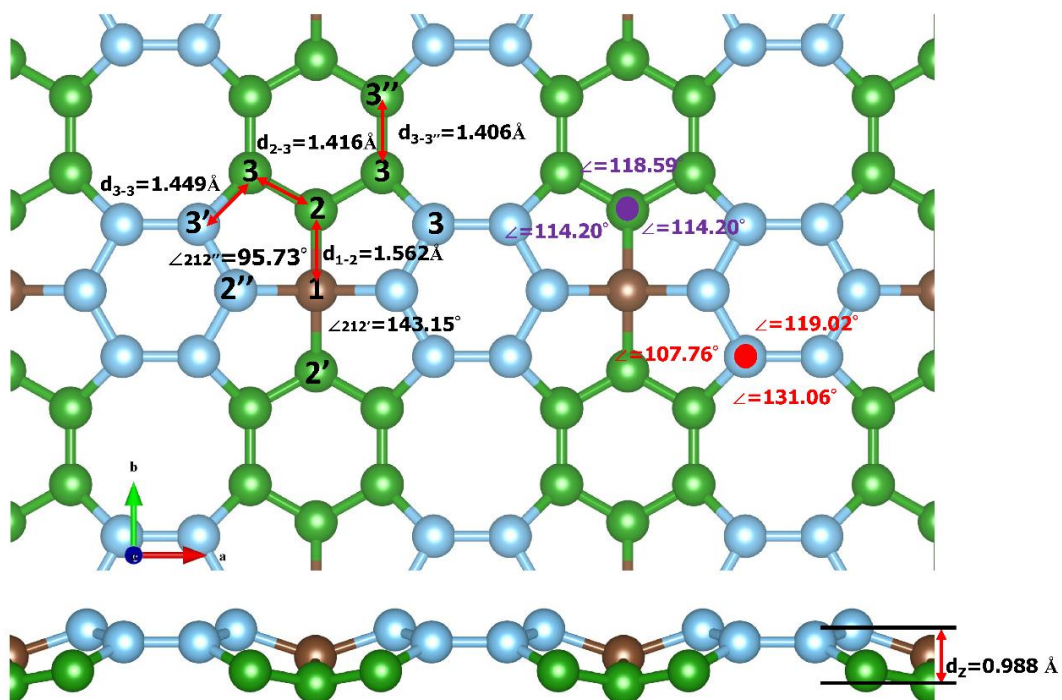

Fig. S2 Structure details of Me-graphene

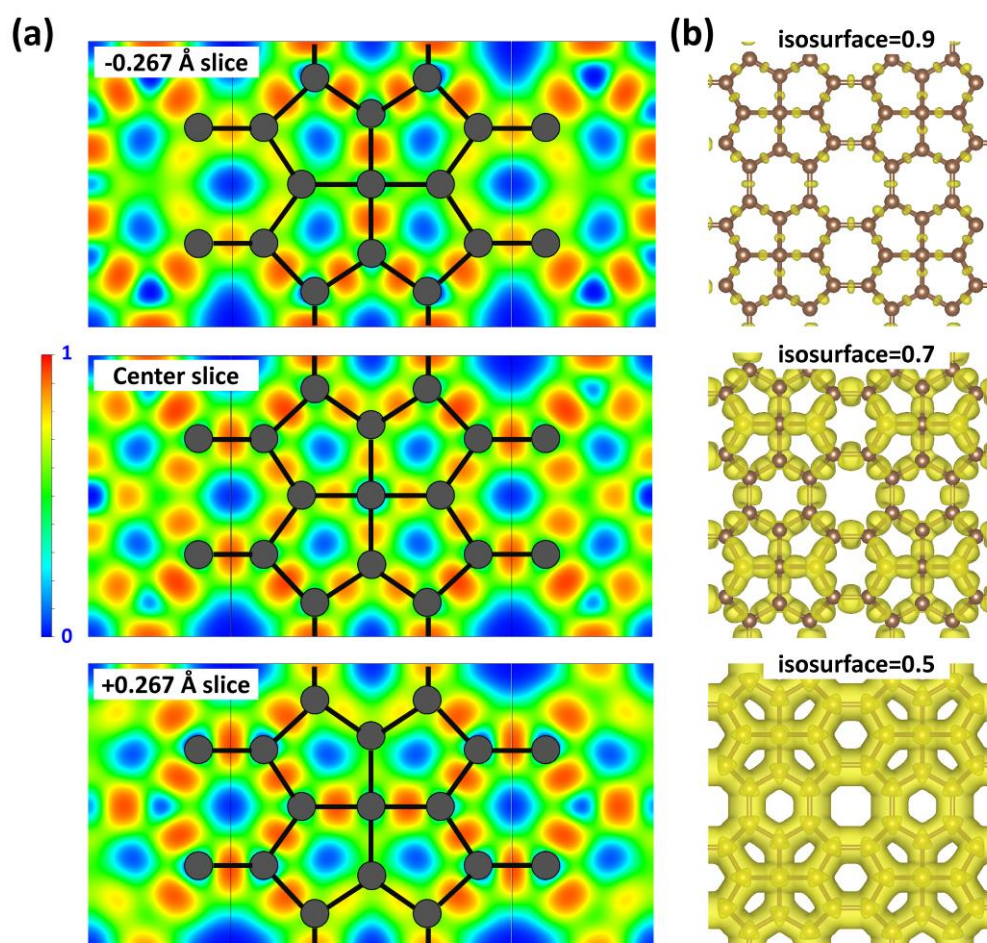

Fig. S3 ELF of Me-graphene: (a) slice at different positions, (b) with different isosurfaces

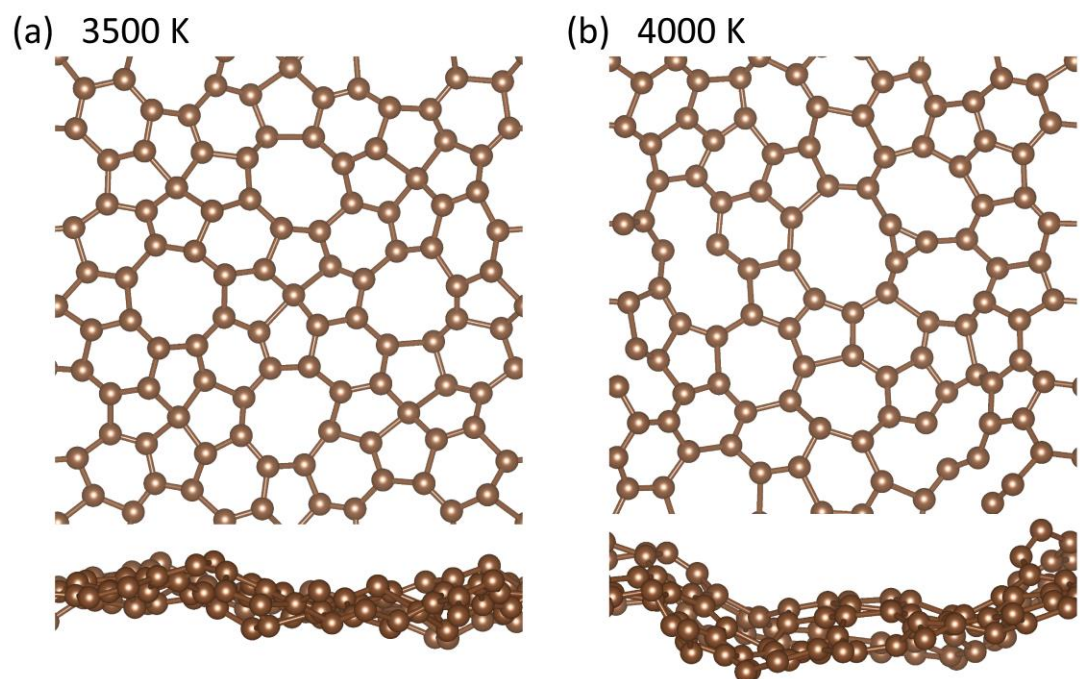

**Fig. S4** Snapshot of structure (Top view and side view) of Me-graphene at temperature of (a) 3500K and (b) 4000 K after 5ps BOMD simulation.



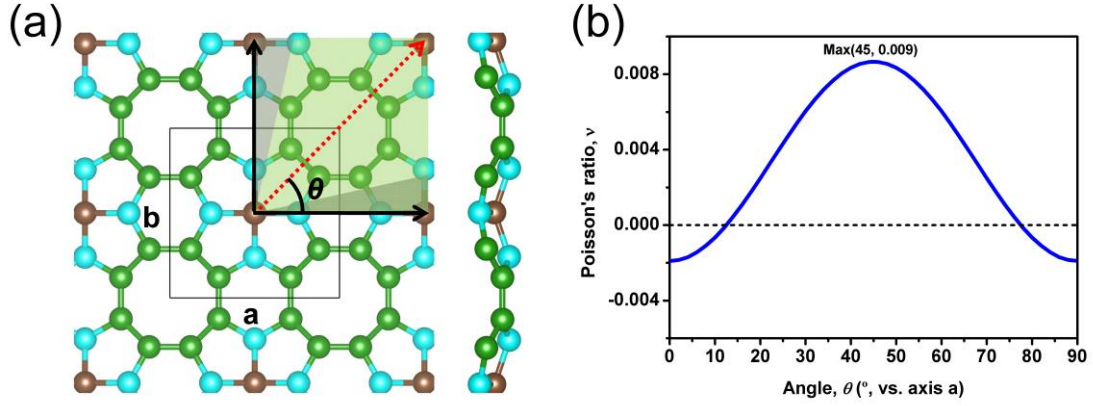

**Fig. S5** (a) The illustration of Poisson's ratio distribution in different directions in x-y plane of Me-graphene. (The gray angle region represents negative value while the green angle regions represent positive value. And the blue arrow is the specified direction  $\vartheta$ .) (b) The variation of Poisson's ratio ( $v$ ) value in different directions (represented by angle  $\vartheta$ , vs. axis **a**) in x-y plane of Me-graphene. Due to the limitation of symmetry, only two concise angle regions (0-45 degree and 45-90 degree, respectively) with a total angle region ranging from 0 to 90 degree are shown.

**Direction-depended Poisson's ratio calculation.** The value of  $v(\vartheta)$  can be calculated via equations reported in previous work<sup>1</sup> as listed as below:

$$v(\theta) = \frac{(v_{xy}\cos^4\theta - d_1\cos^2\theta\sin^2\theta + v_{xy}\sin^4\theta)}{(\cos^4\theta + d_2\cos^2\theta\sin^2\theta + d_3\sin^4\theta)}, \quad (\text{ES1})$$

where,  $\vartheta$  is the included angle between axis  $x$  (here, axis  $x$  is corresponding to axis **a** while axis  $y$  is axis **b** in Me-graphene) and specified direction  $\vartheta$  to apply strain, and  $v_{xy}$ ,  $d_1$ ,  $d_2$  and  $d_3$  are defined as:

$$v_{xy} = C_{21}/C_{22} = C_{12}/C_{22}, \quad (\text{ES2})$$

$$d_1 = \frac{C_{11}}{C_{22}} + 1 - \frac{C_{11}C_{22} - C_{12}^2}{C_{22}C_{66}} \quad (\text{ES3})$$

$$d_2 = -\left(2\frac{C_{12}}{C_{22}} - \frac{C_{11}C_{22} - C_{12}^2}{C_{22}C_{66}}\right) \quad (\text{ES4})$$

$$d_3 = \frac{C_{11}}{C_{22}} \quad (\text{ES5})$$

Here, the  $C_{11}$ ,  $C_{22}$ ,  $C_{12}$  and  $C_{66}$  are 210, 210, -0.4, and 103 N/m, respectively. The calculated value of  $v(\vartheta)$  is  $v(\vartheta = 0^\circ) = -0.002$ ,  $v(\vartheta = 12.5^\circ) = 0$ ,  $v(\vartheta = 45^\circ) = 0.009$ ,  $v(\vartheta = 77.5^\circ) = 0$  and  $v(\vartheta = 90^\circ) = -0.002$ . In the concise angle region (0 to 45 degree), the angle interval with negative value is from 0 to 12.5 degree (as 27.8 % for full directions in x-y plane), while the angle interval with positive value is from 12.5 to 45 degree (as 72.2 % for full directions in x-y plane). And there is one ideal ZPR at  $\vartheta = 12.5^\circ$  for one concise angle region. More important, all values are less than  $|0.01|$ , suggesting the highly near ZPR in Me-graphene.

**GW calculation.** The GW calculations were carried out in the framework of DFT-GW scheme by VASP package with the projector-augmented wave method (PAW) and the Perdew-Burke-Ernzerhof (PBE) exchange correlation functional. This GW calculations were performed in a partially self-consistent way (the so-called GW0 approach).<sup>2</sup> In order to obtain the accurate GW band gaps, it is vital to carefully examine the convergence of the quasiparticle bands in the GW calculations.

To test the GW method is computed correctly with reasonable output, the silicon bulk has been checked, of which the GW band gap of silicon (k: 8×8×8, two atoms in unit cell, empty band number was 36 (NBANDS = 40), the energy cutoff for the response functions was 150 eV) has been calculated to be 1.09 eV, well agreed with the experiment result (1.1 eV)<sup>3</sup>.

For 2D system, generally, GW band gap is affected by empty band number (N), k-points (n×n) and the separation distance ( $L_z$ ) in computation.

However, as well known, GW calculation is highly expensive to cost computation resource, especially its ultra-high memory occupation. To obtain an acceptable band gap with reasonable accuracy within limited computation resource, several approximations are applied: (a) The GW calculations were performed in a partially self-consistent way (GW0 approach) to cut down the computation cost; (b) Since the GW band gap (GWBG) converges as  $1/L_z$ ,<sup>4,5</sup> a limit gap can be extrapolated with the infinite  $L_z$ , of which  $L_z$  of 10, 12, 15, 20, 25 Å are applied; (c) the ratio of band gap to k-points grid, GWBG(dense k-point)/GWBG(low k-point), possess same convergence limit for different  $L_z$ .

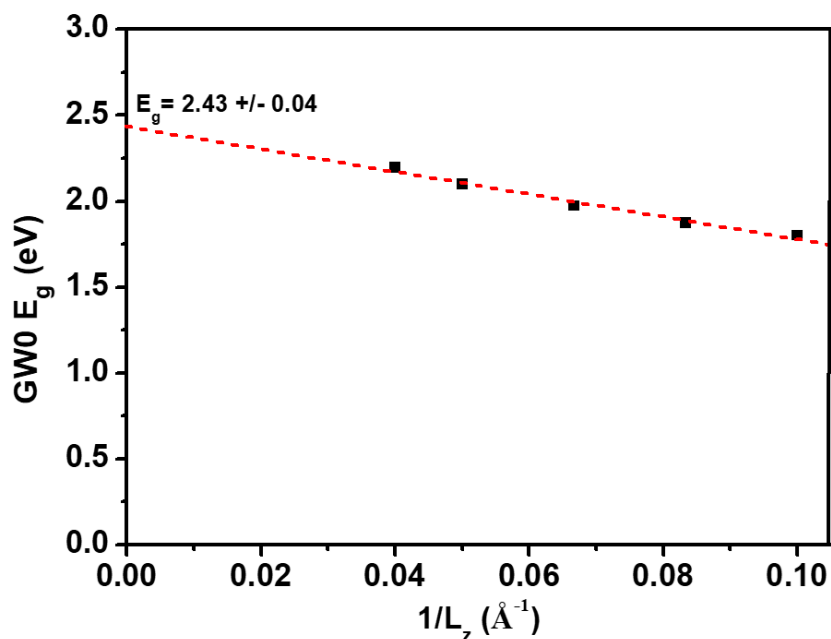

**Fig. S6** GW0 band gap depended on  $L_z$  to extrapolate the bang gap limit (k: 4×4×1)

First, we have tested some convergences: (i) the energy cutoff for the response functions was set to be 150 eV ( $\Delta E_g = 0.007$  eV, vs. 300 eV); (ii) empty band number (N) was set to be 214 (NBANDS = 240); (iii) k-point is 20×20×1 ( $\Delta E_g = 0.008$  eV, vs. 18×18×1). Based on (b), GWBG with different  $L_z$  in low k-point (4×4×1) is carried out to extrapolate the bang gap limit for low k-point situation with a limit GW  $E_g$  of 2.43 +/- 0.037 eV, as shown in Fig. S6. Then, based on (c), the GWBG(dense k-point)/GWBG(low k-point) convergence limit is extrapolated, as shown in Table S1.

**Table S1. GW band gap value depended on  $L_z$  (Å) and k-points. (N=54, NBANDS = 80)**

|                                 | $L_z=10$ | $L_z=12$ | $L_z=15$ | $L_z=20$ |
|---------------------------------|----------|----------|----------|----------|
| 4×4                             | 1.853    | 1.936    | 2.041    | 2.170    |
| 6×6                             | 1.691    | 1.746    | 1.821    | 1.963    |
| 8×8                             | 1.645    | 1.697    | 1.762    | 1.878    |
| 10×10                           | 1.622    | 1.684    | 1.757    | -*       |
| $E_g(6\times6)/E_g(4\times4)$   | 0.913    | 0.902    | 0.892    | 0.905    |
| $E_g(8\times8)/E_g(4\times4)$   | 0.888    | 0.876    | 0.863    | 0.865    |
| $E_g(10\times10)/E_g(4\times4)$ | 0.876    | 0.870    | 0.861    | -*       |

\* Failure occurred due to computer memory limit.

As shown in Table S1, the GWBG(dense k-points)/GWBG(low k-points) highly converges to a constant with the increase of  $L_z$ .

Thus an equation can be concluded, (as approximation (c)), listed as below:

$$\frac{E_g(k:n\times n, L_z=I)}{E_g(k:m\times m, L_z=I)} = \frac{E_g(k:n\times n, L_z=J)}{E_g(k:m\times m, L_z=J)} \quad (\text{ES6})$$

Within our computation limit,  $L_z = 10$  Å can be carried out up to k points of 20×20,

$$\frac{E_g(k:20\times20, L_z=10)}{E_g(k:4\times4, L_z=10)} = \frac{E_g(k:20\times20, L_z=\infty)}{E_g(k:4\times4, L_z=\infty)} \quad (\text{ES7})$$

Where  $E_g(k:20\times20, L_z=10)$  is 1.511 eV,  $E_g(k:4\times4, L_z=10)$  is 1.801 eV,  $E_g(k:4\times4, L_z=\infty)$  is 2.43 +/- 0.037 eV.

And the equation can be adapted as below:

$$\frac{E_g(k:20\times20, c=\infty)}{E_g(k:4\times4, c=\infty)} = 0.839 \quad (\text{ES8})$$

Thus, the accurate estimated GWBG of Me-graphene is calculated to be 2.04 +/- 0.03 eV.

**Structure change and band gap under biaxial strain:** The change of structure and properties under biaxial strain ranging from -5% to +5% are investigated. The change of band lengths and bond angle is shown in Fig. S7. Among them,  $d_{z2}$  (height difference in direction  $z$ ) change outstandingly in the strain range with  $\Delta d_{z2}$  of 0.45 Å, and the change degree of  $d_1$  (the bond length between  $sp^3$ - and  $sp^2$ - carbon atoms) is much smaller but still secondly obvious with  $\Delta d_1$  of 0.14 Å. There is a direct-indirect band gap transition between -3% and -2%, of which band gap is direct type ( $M \rightarrow M$ ) from -5% to -3% while it is indirect type ( $\Gamma \rightarrow M$ ) from -2% to +5%, as shown in Fig. 4b&c in main text. This results from the lowest unoccupied state (LUS) at  $\Gamma$ , which is the CBM at 0% strain, is quite sensitive to strain but the highest occupied state (HOS) HOS at  $\Gamma$  and the HOS and LUS at  $M$  are not, as shown in Fig. 4c in main text. The partial charge density distribution of the HOS and LUS at  $\Gamma$  and  $M$  are shown in Fig. S8. As shown, the LUS at  $\Gamma$ , which mainly contributed by the neighbor  $C_3$ - $p_z$  coupling, is sensitive to the change of  $d_3$  and  $d_{z2}$ . And the  $d_{z2}$  changes quickly under strain to adjust the  $p_z$ - $p_z$  overlap from weak at -5% to strong at +5% to sharply shift the energy level. At the meantime, the changes of  $p_z$ - $p_z$  coupling of the HOS at  $\Gamma$ , and the HOS and LUS at  $M$  are all so slight that the strain-sensitive LUS at  $\Gamma$  switches the band gap between direct and indirect conveniently. In general, the band gap turns from 2.62/1.60/1.04 (at -5%) to 1.24/0.54/0.16 eV (+5%) with GW0/HSE06/PBE, as shown in Table S2.

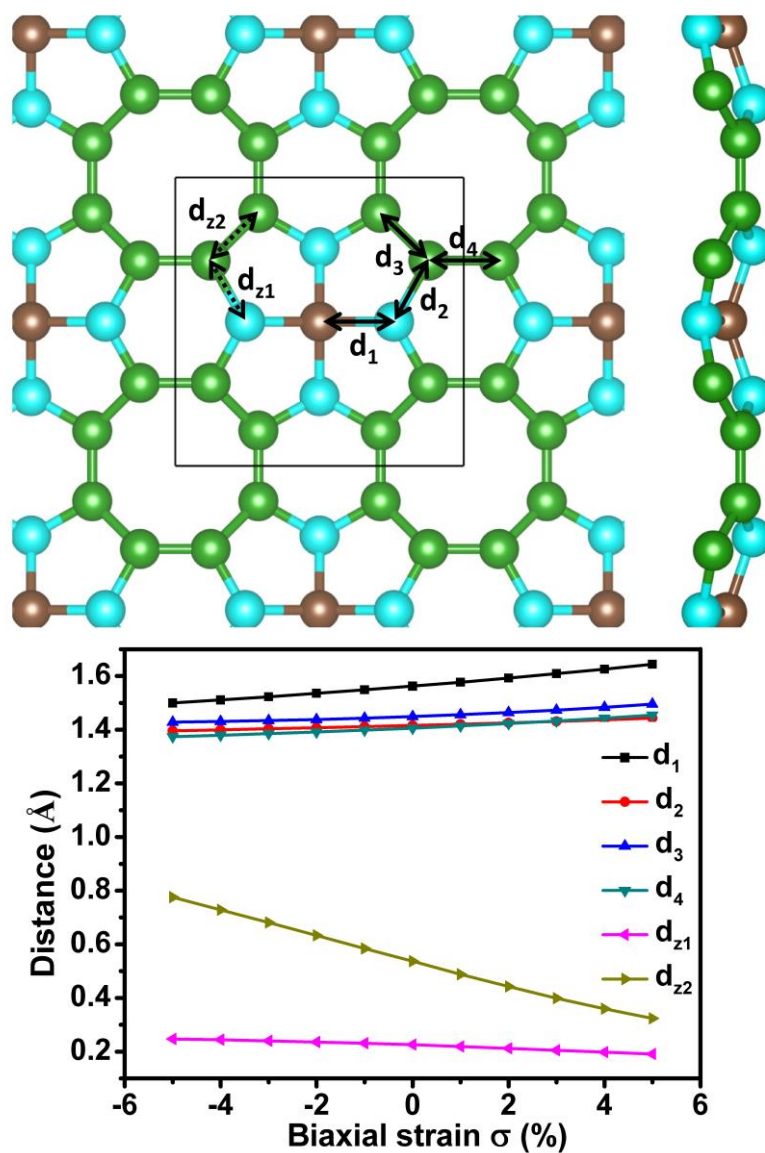

**Fig. S7** Specific bond length and highness change under biaxial strain from -5% to +5%

**Table S2.** Band gap of Me-graphene under different biaxial strain from -5% to +5%.

| Strain | PBE (eV) | HSE06 (eV) | GW0 (eV) | Type        |
|--------|----------|------------|----------|-------------|
| -5     | 1.04     | 1.60       | 2.62     | M→M         |
| -4     | 1.04     | 1.60       | 2.55     | M→M         |
| -3     | 1.06     | 1.62       | 2.57     | M→M         |
| -2     | 0.95     | 1.43       | 2.49     | M→ $\Gamma$ |
| -1     | 0.79     | 1.25       | 2.27     | M→ $\Gamma$ |
| 0      | 0.65     | 1.08       | 2.04     | M→ $\Gamma$ |
| 1      | 0.51     | 0.94       | 1.82     | M→ $\Gamma$ |
| 2      | 0.40     | 0.80       | 1.63     | M→ $\Gamma$ |
| 3      | 0.30     | 0.69       | 1.46     | M→ $\Gamma$ |
| 4      | 0.22     | 0.61       | 1.33     | M→ $\Gamma$ |
| 5      | 0.16     | 0.54       | 1.24     | M→ $\Gamma$ |



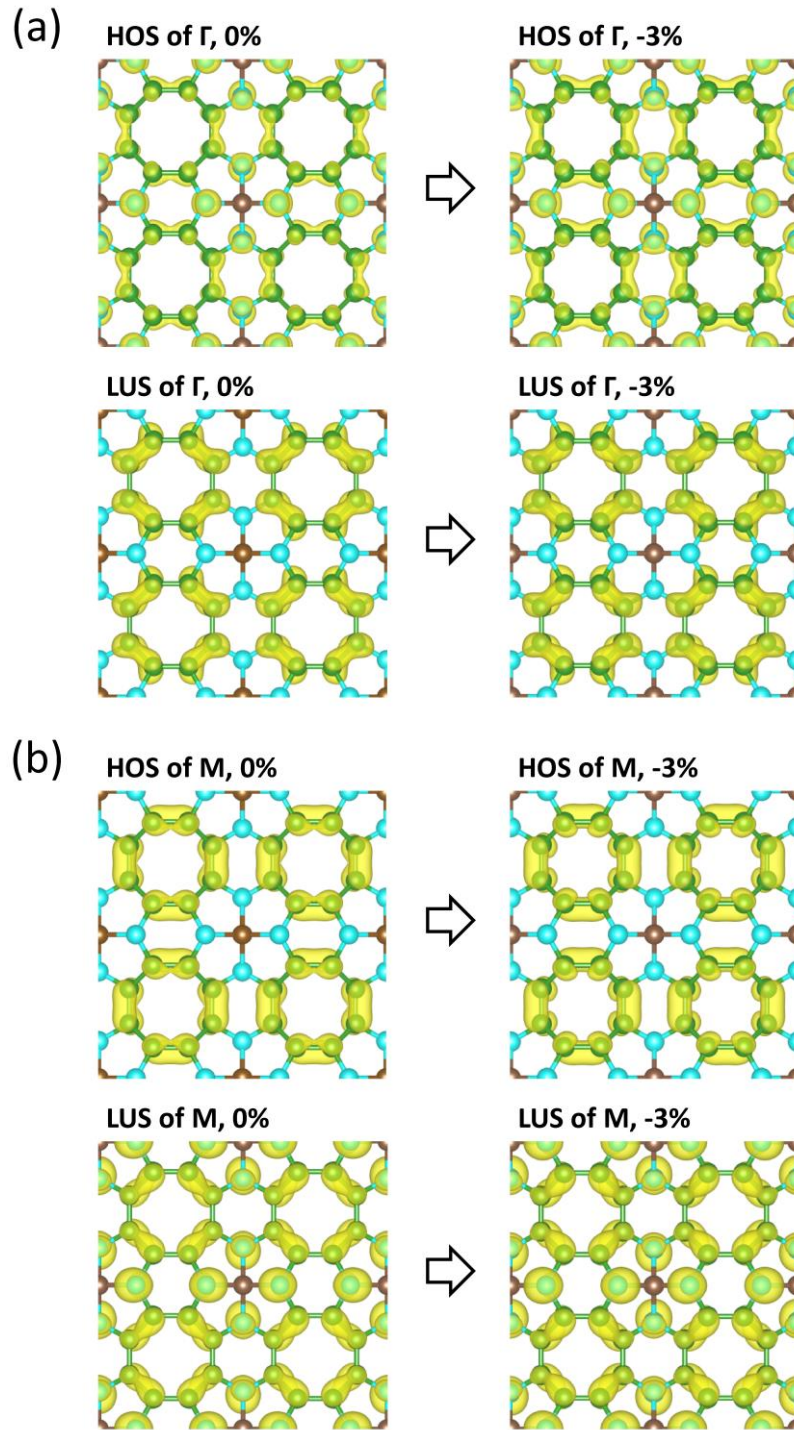

**Fig. S8** The partial charge density of specific state at specific k point. (a) The highest occupied state (HOS) and the lowest unoccupied state (LUS) at  $\Gamma$  under biaxial strain of 0% and -3%. (b) The HOS and the LUS at M under biaxial strain of 0% and -3%.

**Exciton binding energy.** Ordinary DFT method has no consideration on exciton effects in calculation to make their prediction on optical property unreliable. There are ways to estimate the exciton binding energy ( $E_b$ ), including not just computation with consideration of the electron-hole interaction, such as GW-BSE,<sup>6</sup> but also the relationship between GW band gap and exciton binding energy  $E_b$ , which are concluded rules by data fitting, even some methods highly consisted with GW-BSE on pure data collection. In practice, since the GW-BSE calculation is highly expensive in computation resource required harsh hardware conditions, low cost and convenient method to obtain reasonable energy with acceptable value is strongly desired.

Based on previous studies,<sup>7,8</sup> the exciton binding energy is highly near-linear to their GW band gap,  $E_b = 0.21 \cdot E_g(\text{GW}) + 0.40$ , when the  $E_g$  is no less than about 1 eV within forced linearly fitting. Thus, the exciton binding energy can conveniently be estimated. For Me-graphene here,  $E_g(\text{GW}) = 2.04$  eV with estimated exciton binding energy  $E_b$  of 0.83 eV, that the optical band gap of Me-graphene is estimated to be 1.21 eV, comparable to HSE06 value (1.08 eV). Based on the narrow difference on optical band gap, the optical properties carried out with HSE06 instead of GW-BSE is reasonable and acceptable for Me-graphene, especially which is more computation practical.

**Carrier mobility calculation.** Based on the deformation potential theory of Bardeen and Shockley,<sup>9,10</sup> the carrier mobility in direction  $\alpha$  ( $\alpha = a(x), b(y)$ ) of each band  $\mu_\alpha$  of 2D structure is defined as,

$$\mu_\alpha = \frac{e\hbar^3 C_\alpha}{k_B T m_\alpha^* m_d (E_{l\alpha})^2} \quad (\text{ES9})$$

where  $C_\alpha$ ,  $k_B$ ,  $T$ ,  $m_\alpha^*$ , and  $E_{l\alpha}$  are the elastic constant in direction  $\alpha$ , the Boltzmann constant, temperature (set as 300 K, here), effective mass in direction  $\alpha$ , and deformation potential for  $\alpha$ , respectively.  $m_d$  is the average of effective mass in direction **a** and direction **b**, defined as  $m_d = (m_a^* m_b^*)^{1/2}$ . Deformation potential  $E_{l\alpha}$  is defined by  $E_{l\alpha} = (\Delta E)/(\Delta l/l)$ , where  $\Delta E$  and  $\Delta l/l$  represent the change of band energy and strain in that direction, compared to constant  $l$ , respectively. And the step  $\Delta l/l$  is 0.2% and strain range is from -0.6% to 0.6% to fitting an average  $E_{l\alpha}$ .

Here, only the axial directions are considered, of which direction **b** is equal to direction **a** in symmetry. The calculated result is shown in Table S3. The effective mass of **a** (or **b**) at CBM and VBM of Me-graphene ( $m_{\text{VBM},a}^*$  and  $m_{\text{CBM},a}^*$ ) are -0.18 and 0.68  $m_e$ , respectively. The deformation potential  $E_{l,\text{VBM},a}$  and  $E_{l,\text{CBM},a}$  is -0.93 and -7.86 eV, respectively, agreed with that the energy level of the CBM is sensitive but the VBM is not. At room temperature (300 K), the calculated carrier mobility of  $\mu_h$  and  $\mu_e$  in direction **a** is  $1.60 \times 10^5$  and  $157 \text{ cm}^2 \text{ V}^{-1} \text{ s}^{-1}$ , respectively.

**Table S3.** Mobility calculation details parameters of hole (h) and electron (e) in direction **a** and **b**. ( $C_a = C_b = C_{11} = 210 \text{ N/m}$ )

|                                                       | h(a)               | h(b)               | e(a)  | e(b)  |
|-------------------------------------------------------|--------------------|--------------------|-------|-------|
| Effective mass ( $m_e$ )                              | -0.18              | -0.18              | 0.68  | 0.68  |
| $m_d$ ( $m_e$ )*                                      | 0.18               | 0.18               | 0.68  | 0.68  |
| $E_l$ (eV)                                            | -0.93              | -0.93              | -7.86 | -7.86 |
| $\mu$ ( $\text{cm}^2 \text{ V}^{-1} \text{ s}^{-1}$ ) | $1.60 \times 10^5$ | $1.60 \times 10^5$ | 157   | 157   |

\*  $m_e$  is the static mass of electron.

To understand the contribution to the mobility difference between electron and hole, the equation ES9 can be simplified for Me-graphene as below:

$$\mu_{\alpha} \propto \frac{1}{m_a^{*2} E_{l,a}^2} \quad (\text{ES10})$$

The difference of effective mass of  $m_{\text{VBM},a}^*$  and  $m_{\text{CBM},a}^*$  and deformation potential  $E_{l,\text{VBM},a}$  and  $E_{l,\text{CBM},a}$  decides the difference of mobility for different carriers.

For the contribution of effective mass and deformation potential, effective mass part ( $(m^*)^{-2}$ ) of hole/electron is  $(1/0.18^2)/(1/0.68^2)=14.27$  times, while deformation potential part ( $E_l^{-2}$ ) of hole/electron is  $(1/0.93^2)/(1/7.86^2)=71.43$  times. Thus, the significantly smaller effective mass as well as deformation potential of hole than electron results in the outstanding difference mobility for carrier hole and electron, as about  $10^3$  times.

**Understanding of deformation potential difference between electron and hole.** As Fig. S9 shown, the partial density of VBM locates between atom pairs of (1,2), (3,4), (5,6), and (7,8), of which the bond lengths are denoted as  $d_{1a}$  ('a' represent it parallel to axial **a**) and  $d_{1b}$  ('b' represent it parallel to axial **b**) within a typical  $p_z$ - $p_z$  coupling, respectively, while the partial density of CBM locates between atom pairs (2,3), (4,5), (6,7), and (8,1), denoted as  $d_2$  within typical  $p_z$ - $p_z$  coupling/hybridization as well, of which there is position difference in direction  $z$  between atom pairs of (2,3), (4,5), (6,7), and (8,1), denoted as  $d_{z2}$ , which represents the highness difference between atoms of each pair. And the  $d_{z2}$  can affect the  $p_z$ - $p_z$  orbital overlap (Fig. S9f) as well as bond length do (Fig. S9e).

Based on the partial density of VBM locates between atom pairs of (1,2), (3,4), (5,6), and (7,8), the partial density zone (PDZ) of each pair can be labelled as  $n_e(1,2)$ ,  $n_e(3,4)$ ,  $n_e(5,6)$ , and  $n_e(7,8)$  with energy of  $E(n_e(1,2))$ ,  $E(n_e(3,4))$ ,  $E(n_e(5,6))$  and  $E(n_e(7,8))$ , respectively, of which the total energy of partial density zone of VBM is the summation of all of the pairs, listed as below:

$$E_{\text{VBM}} = E(n_e(1,2)) + E(n_e(3,4)) + E(n_e(5,6)) + E(n_e(7,8)) \quad (\text{ES11})$$

Where all PDZs basically determined by the distance between atoms of each pair ( $d_{1a}$  or  $d_{1b}$ ). Thus, ES11 can be described as equation listed below:

$$E_{\text{VBM}}(d_{1a}, d_{1b}) = E(d_{1a}) + E(d_{1a}) + E(d_{1b}) + E(d_{1b}) = 2E(d_{1a}) + 2E(d_{1b}) \quad (\text{ES12})$$

Similarly, the total energy of PDZ of CBM can be described by equation listed as below:

$$E_{\text{CBM}} = E(n_e(2,3)) + E(n_e(4,5)) + E(n_e(6,7)) + E(n_e(8,1)) \quad (\text{ES13})$$

Where, the energy of each PDZ involves not just distance between atoms in each pair (denoted as  $d_2$ ) but also the highness difference (denoted as  $d_{z2}$ ), which can affect the  $p_z$ - $p_z$  orbitals overlap in  $\pi$  bonding.

Thus, ES13 can be described as new equation listed below:

$$E_{\text{CBM}}(d_2, d_{z2}) = E(d_2, d_{z2}) + E(d_2, d_{z2}) + E(d_2, d_{z2}) + E(d_2, d_{z2}) = 4E(d_2, d_{z2}) \quad (\text{ES14})$$

Where all pairs have the same kind of bond length, the same shape of PDZ as well as the same response to the strain in symmetry.

Interestingly, due to the linear relationship between PDZ energy of VBM (or CBM) and applied strain  $\sigma_a$  (within narrow range of  $\sigma_a$ ), as shown in Fig. S10a,  $E_{\text{VBM}}$  and  $E_{\text{CBM}}$  can be described as:

$$E_{\text{VBM}} = k_{\text{VBM}}\sigma_a \quad (\text{ES15})$$

$$E_{\text{CBM}} = k_{\text{CBM}}\sigma_a \quad (\text{ES16})$$

Where, the  $k_{\text{VBM}}$  and  $k_{\text{CBM}}$  are constant coefficients.

Due to the distance and highness  $d_{1a}$ ,  $d_{1b}$ ,  $d_z$  and  $d_{z2}$  are all in linear relationship with applied strain as well, as shown in Fig. S10b-d, the  $E_{\text{VBM}}(d_{1a}, d_{1b})$  and  $E_{\text{CBM}}(d_z, d_{z2})$  can transform into equations listed as below:

$$E_{\text{VBM}}(d_{1a}, d_{1b}) = 2k_{1a}d_{1a} + 2k_{1b}d_{1b} \quad (\text{ES17})$$

$$E_{\text{CBM}}(d_z, d_{z2}) = 4k_2d_z + 4g_{z2}d_{z2} \quad (\text{ES18})$$

Where,  $k_{1a}$ ,  $k_{1b}$ ,  $k_2$  is coefficient depended on distance of each atom pair (as well as the C=C bond length), and  $g_{z2}$  is depended on the highness difference of each pair.

If we roughly considered the all C=C bond performs similar or same in response, due to their close bond length and the high covalence in Me-graphene, there is  $k_{1a}=k_{1b}=k_2$  (unified as  $k_\pi$ ), then

$$E_{\text{VBM}}(d_{1a}, d_{1b}) = 2k_\pi(d_{1a} + d_{1b}) \quad (\text{ES19})$$

$$E_{\text{CBM}}(d_z, d_{z2}) = 4k_\pi d_z + 4g_{z2}d_{z2} \quad (\text{ES20})$$

Based on the result shown as Fig. S9d, there is  $2(\Delta d_{1a} + \Delta d_{1b}) \approx 4\Delta d_z$ . Thus, the main difference between deformation potential of  $E_{\text{I,VBM},a}$  and  $E_{\text{I,CBM},a}$  would be

$$E_{\text{I,VBM},a} - E_{\text{I,CBM},a} = \Delta E_{\text{VBM}}(d_{1a}, d_{1b})/\Delta\sigma_a - \Delta E_{\text{CBM}}(d_z, d_{z2})/\Delta\sigma_a = -4g_{z2}(\Delta d_{z2}/\Delta\sigma_a) \quad (\text{ES21})$$

Based on the deformation potential  $E_{\text{I,VBM},a}$  and  $E_{\text{I,CBM},a}$  is -0.93 and -7.86 eV, we can conclude that the  $g_{z2}$  is times larger than  $k_\pi$  in value.

Obviously, the outstanding difference of  $E_{\text{I,VBM},a}$  and  $E_{\text{I,CBM},a}$  results from the highness-difference-sensitive  $p_z$ - $p_z$  overlap determined by the significant change of  $d_{z2}$ .

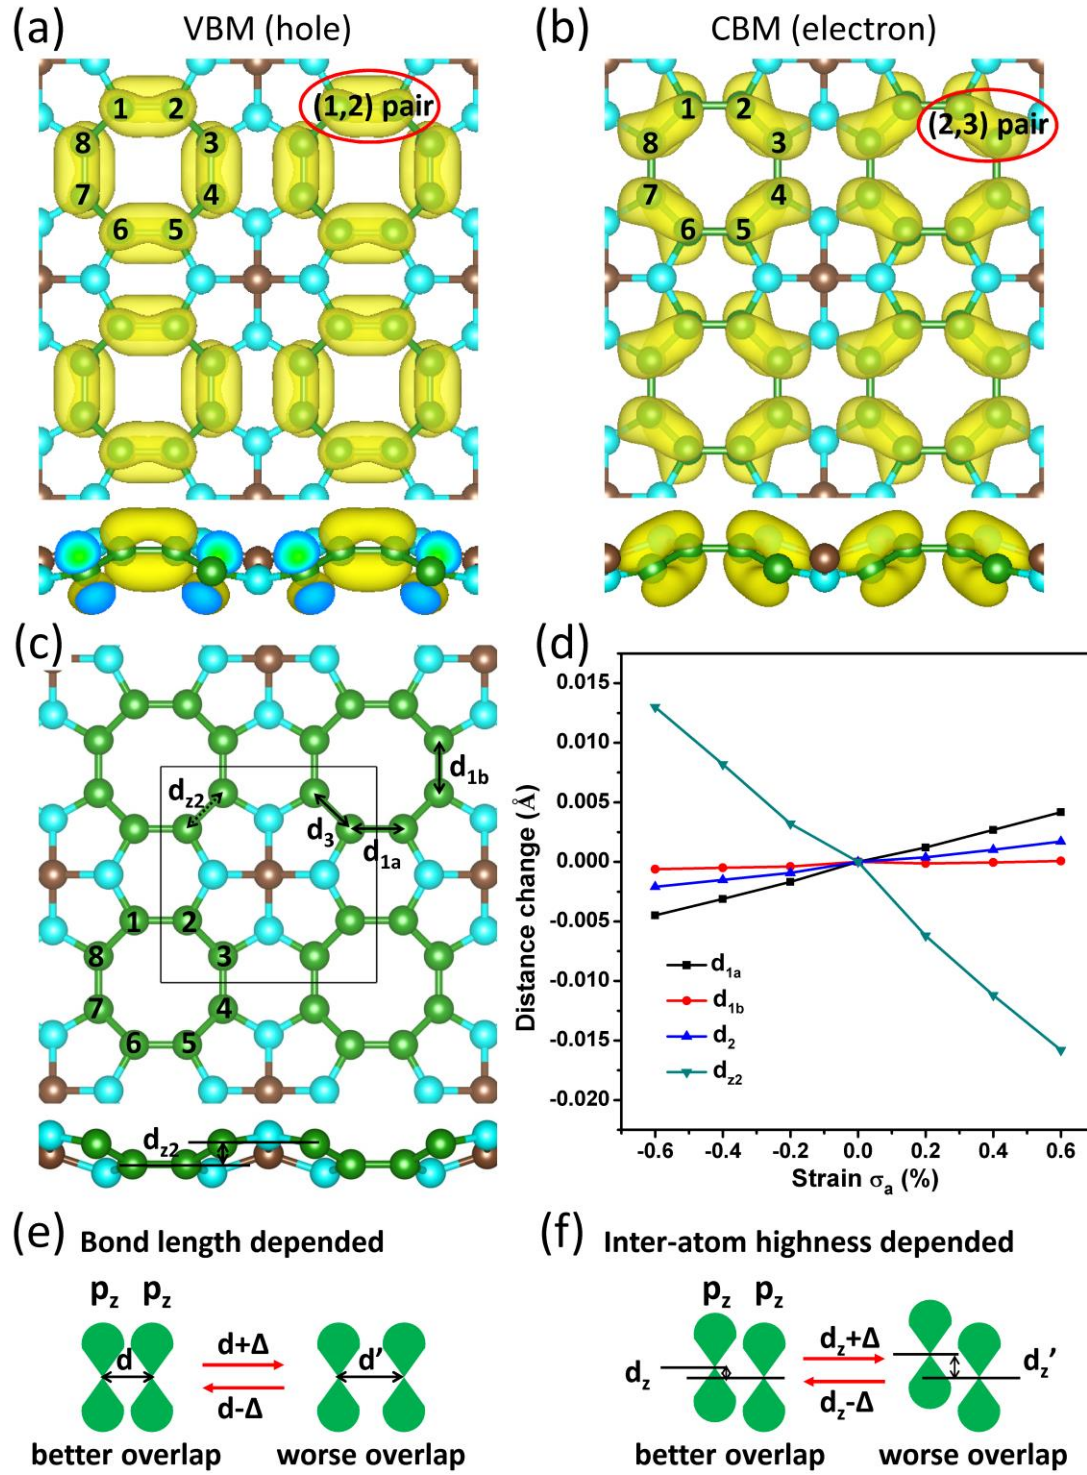

**Fig. S9** (a) Partial density of VBM and (b) CBM; (c) the specific bond length ( $d_{1a}$ ,  $d_{1b}$ ,  $d_2$ ) and atomic position highness difference ( $d_{22}$ ); (d) the change of  $d_{1a}$ ,  $d_{1b}$ ,  $d_2$ , and  $d_{22}$  under uniaxial strain (from -0.6% to +0.6%) to obtain deformation potential; (e) bond length depended orbital coupling to form  $\pi$  bond by  $p_z$  and  $p_z$  orbitals; (f) inter-atom highness depended orbital coupling to form  $\pi$  bond by  $p_z$  and  $p_z$  orbitals.



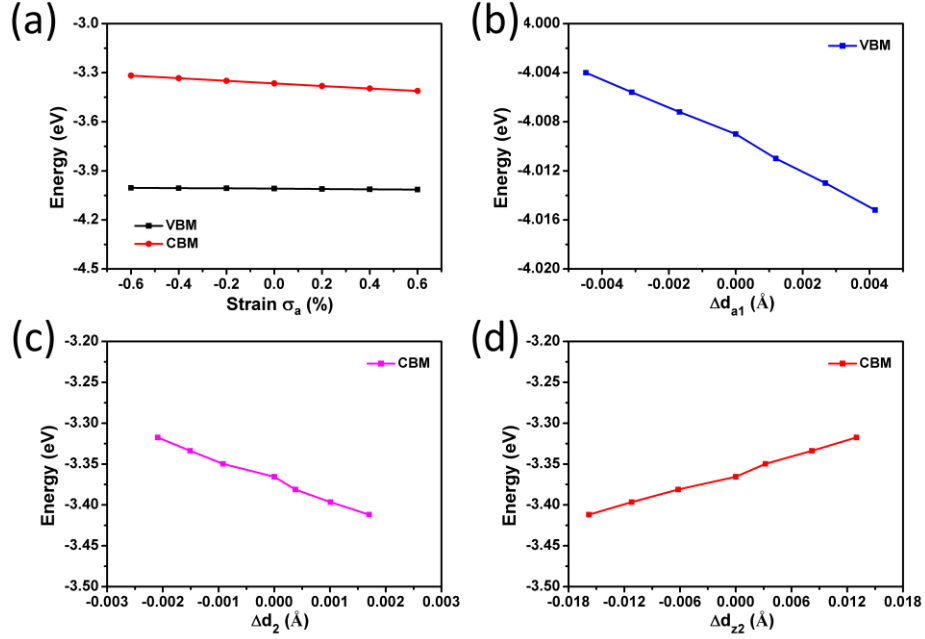

**Fig. S10** (a) The energy of CBM and VBM under different strain (from -0.6% to +0.6%) to obtain deformation potential; (b) The energy of VBM in near-linear relationship with bond length change  $\Delta d_{a1}$ ; (c) The energy of CBM in near-linear relationship with bond length change  $\Delta d_2$ ; (d) The energy of CBM in near-linear relationship with inter-atom highness change  $\Delta d_{22}$ .

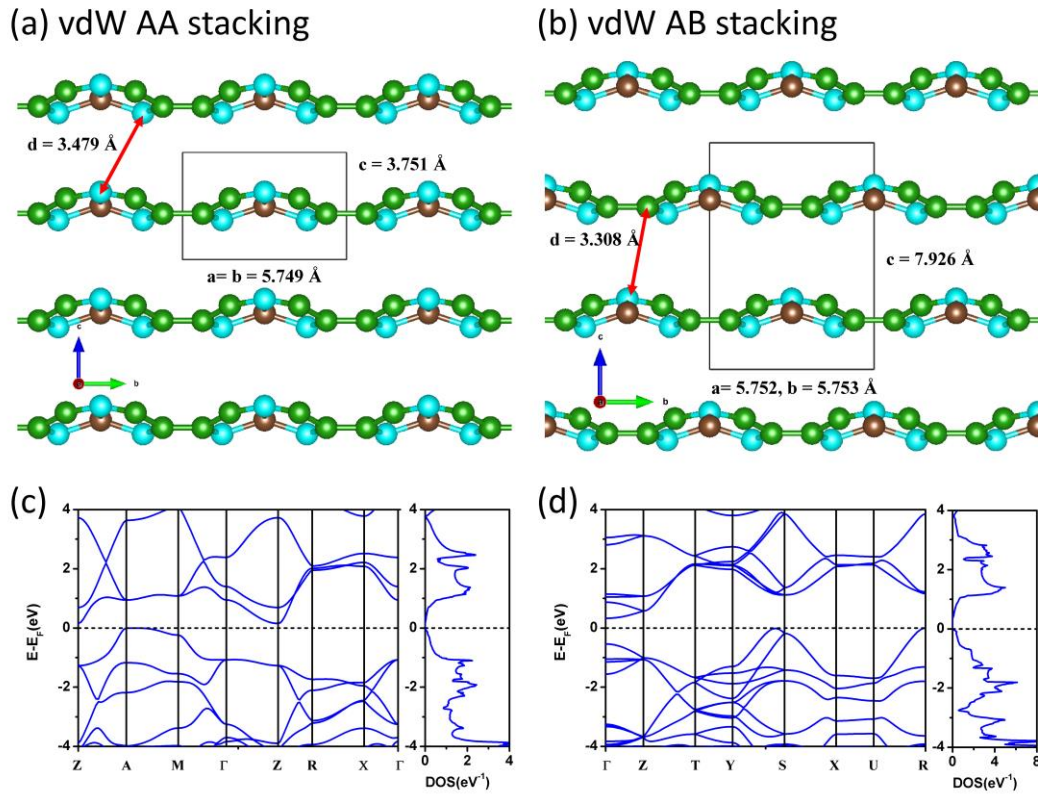

**Fig. S11** Side views of structure of (a) AA and (b) AB stacking of Me-graphene vdW bulks. Black, blue and green balls represents  $C_1$ ,  $C_2$  and  $C_3$  atom in Me-graphene, respectively. The band structure and DOS of (c) AA stacking and (d) AB stacking with DFT+D3.

**GW calculation of layered bulks.** Similar setting to monolayer is applied in bulk structure as well, except that the DFT-D3 was considered to treat their interlayered vdW interaction in layered bulk. For the two layered bulk structures, the GW0-D3 band gap is estimated to be 0.76 eV for AA stacking (k-points:  $6\times6\times12$ ) and 0.96 eV for AB stacking (k-points:  $6\times6\times6$ ).

## References

1. L. Wang, A. Kutana, X. Zou and B. I. Yakobson, *Nanoscale*, 2015, **7**, 9746-9751.
2. G. Onida, L. Reining and A. Rubio, *Rev. Mod. Phys.*, 2002, **74**, 601-659.
3. L. Brus, *J. Phys. Chem.*, 1994, **98**, 3575-3581.
4. J. P. A. Charlesworth, R. W. Godby and R. J. Needs, *Phys. Rev. Lett.*, 1993, **70**, 1685-1688.
5. N. Berseneva, A. Gulans, A. V. Krashenninnikov and R. M. Nieminen, *Phys. Rev. B*, 2013, **87**, 035404.
6. M. Rohlfing and S. G. Louie, *Phys. Rev. B*, 2000, **62**, 4927-4944.
7. J.-H. Choi, P. Cui, H. Lan and Z. Zhang, *Phys. Rev. Lett.*, 2015, **115**, 066403.
8. M. Zhang, L.-Y. Huang, X. Zhang and G. Lu, *Phys. Rev. Lett.*, 2017, **118**, 209701.
9. J. Bardeen and W. Shockley, *Phys. Rev.*, 1950, **80**, 72-80.
10. G. Schusteritsch, M. Uhrin and C. J. Pickard, *Nano Lett.*, 2016, **16**, 2975-2980.
